# Supplementary material for: High Expression of NT5DC2 Is a Negative Prognostic Marker in Pulmonary Adenocarcinoma
Source: MDPI journal article supplement (doi:10.3390/cancers14061395), 2022-03-09
Supplement: s1 [file s1]

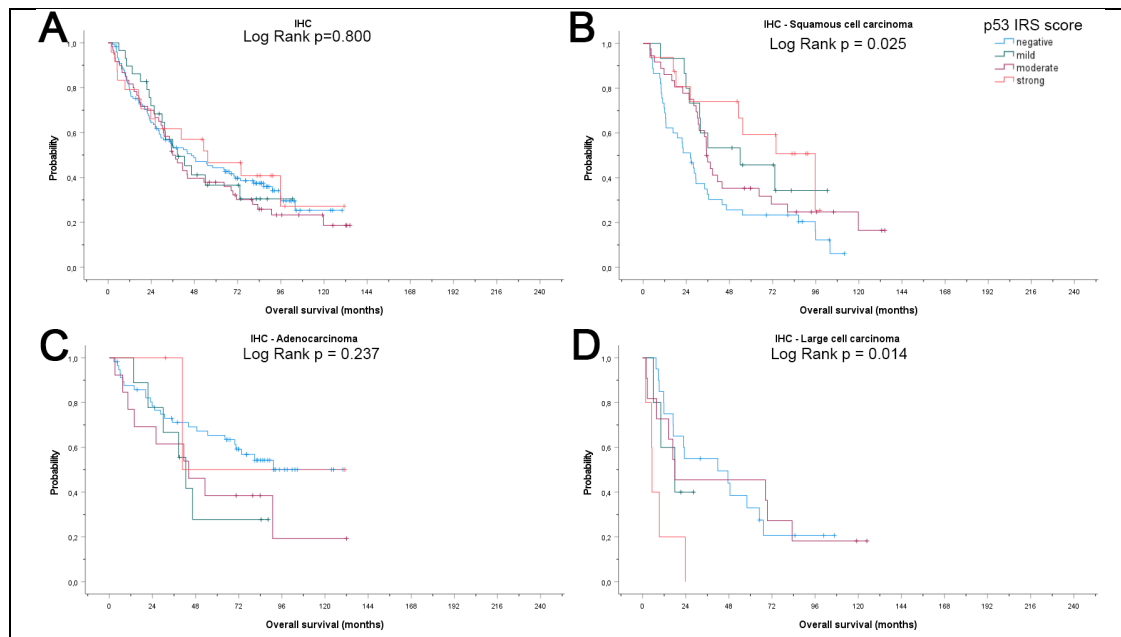

**Figure S1. Kaplan-Meier curves of univariate survival regarding nuclear p53 IHC stain.** IRS score is split by negative (IRS 0-1), mild (IRS 2-3), moderate (IRS 4-8) and strong (IRS 9-12). Analyses present survival in the overall cohort (A), squamous cell carcinoma (B), adenocarcinoma (C) and large cell carcinoma (D). In contrast to adenocarcinoma, in squamous cell carcinoma an overexpression of nuclear p53 results in beneficial survival.
