# Supplementary material for: High Expression of NT5DC2 Is a Negative Prognostic Marker in Pulmonary Adenocarcinoma
Source: MDPI journal article supplement (doi:10.3390/cancers14061395), 2022-03-09
Supplement: s1 [file s1]

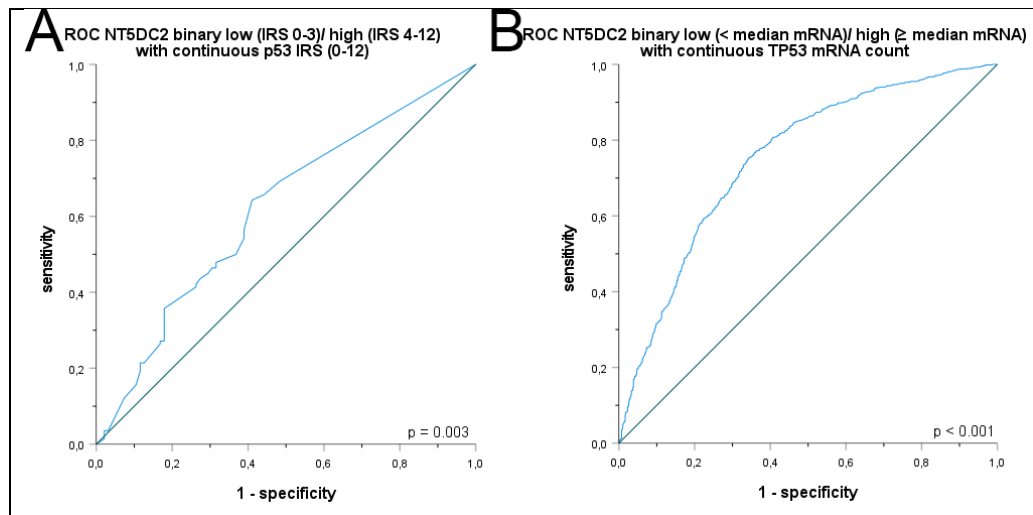

**Figure S1. Receiver-operating characteristic analysis** of binary NT5DC2 expression with continuous IRS (0-12) of p53 in the protein expression analysis cohort (**A**) and binary NT5DC2 expression with continuous mRNA TP53 count in the gene expression analysis cohort (**B**).
