# Supplementary material for: High Expression of NT5DC2 Is a Negative Prognostic Marker in Pulmonary Adenocarcinoma
Source: MDPI journal article supplement (doi:10.3390/cancers14061395), 2022-03-09
Supplement: s1 [file s1]

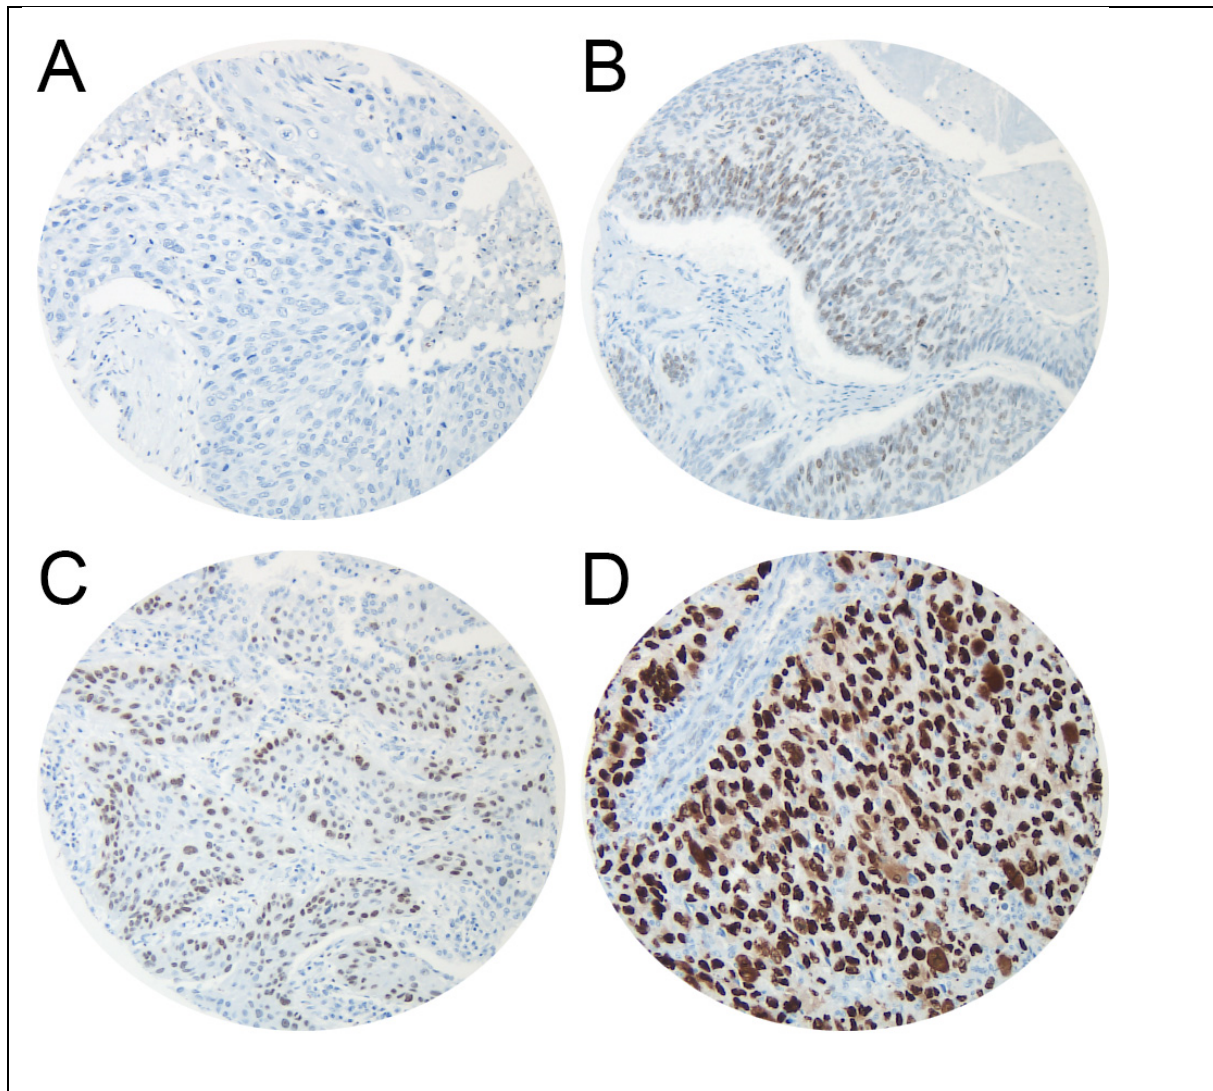

**Figure S1. Immunohistochemistry of p53 in NSCLC TMAs.** Primary antibody was Roche/ Ventana 790-2912 mouse monoclonal IgG<sub>1</sub> anti-p53 (DO-7) antibody. Secondary antibody was Roche/Ventana 760-700 OptiView DAB IHC Detection Kit. Analyses were performed on an Olympus BX51 microscope with an average magnification of x200. (A) represents a negative core (IRS 0), (B) reveals an IRS intensity 1 core (IRS 1), (C) is an intensity 2 core (IRS 2) and (D) is an intensity 3 core (IRS 3), respectively.
