# Supplementary material for: High Expression of NT5DC2 Is a Negative Prognostic Marker in Pulmonary Adenocarcinoma
Source: MDPI journal article supplement (doi:10.3390/cancers14061395), 2022-03-09
Supplement: s1 [file s1]

**Table S1.** Immunohistochemical IRS-Score of NT5DC2 and p53.

| NT5DC2 Expression   |                     |      |                 |      |                     |      |                    |      |                     |
|---------------------|---------------------|------|-----------------|------|---------------------|------|--------------------|------|---------------------|
|                     | Negative<br>IRS 0-1 |      | Mild<br>IRS 2-3 |      | Moderate<br>IRS 4-8 |      | Strong<br>IRS 9-12 |      | <i>p</i> -<br>Value |
|                     | n                   | in % | n               | in % | n                   | in % | n                  | in % |                     |
| <b>p53 Expr.</b>    | 36                  |      | 59              |      | 123                 |      | 17                 |      | 0.016               |
| Negative<br>IRS 0-1 | 26                  | 72.2 | 32              | 54.2 | 54                  | 43.9 | 10                 | 58.8 |                     |
| Mild<br>IRS 2-3     | 4                   | 11.1 | 8               | 13.6 | 16                  | 13.0 | 1                  | 5.9  |                     |
| Moderate<br>IRS 4-8 | 5                   | 13.9 | 13              | 22.0 | 38                  | 30.9 | 4                  | 23.5 |                     |
| Strong<br>IRS 9-12  | 1                   | 2.8  | 6               | 10.2 | 15                  | 12.2 | 2                  | 11.8 |                     |

*p*-value: Kruskal-Wallis test.
