# Supplementary material for: High Expression of NT5DC2 Is a Negative Prognostic Marker in Pulmonary Adenocarcinoma
Source: MDPI journal article supplement (doi:10.3390/cancers14061395), 2022-03-09
Supplement: s1 [file s1]

**Table S2.** Association of NT5DC2 protein expression with tumor grade.

| Protein Expression Cohort | NT5DC2 Protein Expression | Low Grade<br>(G1/2) |        | High Grade<br>(G3/4) |        | <i>p</i> -Value * |
|---------------------------|---------------------------|---------------------|--------|----------------------|--------|-------------------|
|                           |                           | n                   | in %   | n                    | in %   |                   |
| Overall cohort            | Low (IRS 0-3)             | 42                  | 53.2 % | 65                   | 38.2 % | <i>p</i> = 0.029  |
|                           | High (IRS 4-12)           | 37                  | 46.8 % | 105                  | 61.8 % |                   |
| SCC                       | Low (IRS 0-3)             | 22                  | 68.8 % | 33                   | 37.1 % | <i>p</i> = 0.003  |
|                           | High (IRS 4-12)           | 10                  | 31.3 % | 56                   | 62.9 % |                   |
| ADC                       | Low (IRS 0-3)             | 19                  | 42.2 % | 18                   | 40.9 % | <i>p</i> = 1.000  |
|                           | High (IRS 4-12)           | 26                  | 57.8 % | 26                   | 59.1 % |                   |

SCC: squamous cell carcinoma, ADC: adenocarcinoma, \* *p*-values deriving the Fisher's exact test.
